# Supplementary material for: The role of thermokarst evolution in debris flow initiation (Hüttekar Rock Glacier, Austrian Alps)
Source: Copernicus journal article supplement (doi:10.5194/nhess-23-2547-2023), 2023-07-20
Supplement: Supplementary file 1 [file nhess-23-2547-2023-supplement.zip]

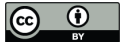

## *Supplement of*

# **The role of thermokarst evolution in debris flow initiation (Hüttekarr Rock Glacier, Austrian Alps)**

**Simon Seelig et al.**

*Correspondence to:* Simon Seelig ([simon.seelig@uni-graz.at](mailto:simon.seelig@uni-graz.at))

- [nhess-23-2547-2023-supplement-title-page.pdf](#)
- [Supplementary\\_Figure\\_S01.jpg](#)
- [Supplementary\\_Figure\\_S02.jpg](#)
- [Supplementary\\_Figure\\_S03.png](#)
- [Supplementary\\_Figure\\_S04.png](#)
- [Supplementary\\_Figure\\_S05.png](#)
- [Supplementary\\_Table\\_S01.csv](#)
- [Supplementary\\_Table\\_S02.csv](#)
- [Supplementary\\_Video.mp4](#)

The copyright of individual parts of the supplement might differ from the article licence.
